# Supplementary material for: Casein kinase 2 promotes the TGF-β-induced activation of α-tubulin acetyltransferase 1 in fibroblasts cultured on a soft matrix
Source: PubMed Central journal article supplement — BMB Rep. 2022 Apr 30;55(4):192–7. doi: 10.5483/BMBRep.2022.55.4.021 (PMC9058472; doi:10.5483/bmbrep.2022.55.4.021), 2022-04-30
Supplement: bmb-55-4-192-supple.pdf [file bmb-55-4-192-supple.pdf]

1 **Manuscript Type:** Article

2

3 **Title:** Casein kinase 2 promotes the TGF- $\beta$  - induced activation of  $\alpha$ -tubulin  
4 acetyltransferase 1 in fibroblasts cultured on a soft matrix

5

6 **Authors' names:** Eunae You<sup>1§</sup>, Jangho Jeong<sup>1§</sup>, Jieun Lee<sup>1</sup>, Seula Keum<sup>1</sup>, Ye Eun  
7 Hwang<sup>1</sup>, Jee-Hye Choi<sup>1\*</sup> and Sangmyung Rhee<sup>1\*</sup>

8

9 **Affiliation:** <sup>1</sup>Department of Life Science, Chung-Ang University, Seoul, 06974,  
10 Republic of Korea

11

12 <sup>§</sup>These authors contributed equally to this work.

13

14 **Running Title:** Regulation of  $\alpha$ -TAT1 activity by CK2

15

16 **Keywords:** TGF- $\beta$ , Casein kinase 2, Microtubule acetylation,  $\alpha$ -tubulin  
17 acetyltransferase 1, Extracellular matrix

18

19 **Corresponding Authors' Information:**

20 Sangmyung Rhee

21 Tel: +82-2-820-5818; Fax: +82-2-825-5206; E-mail:  
22 sangmyung.rhee@cau.ac.kr

23

24 Jee-Hye Choi

25 Tel: +82-2-814-3997; Fax: +82-2-825-5206; E-mail: choijh97@cau.ac.kr

26

## 1 MATERIALS AND METHODS

### 2 Antibodies and reagents

3 Primary antibodies were obtained against the following proteins: acetylated  $\alpha$ -  
4 tubulin (#5335), phospho-STAT3<sup>Y705</sup> (#9131), and phospho-  
5 Smad2<sup>S465/467</sup>/Smad3<sup>S423/425</sup> (#8828; Cell signaling Technology, MA, USA); GFP (sc-  
6 9996),  $\alpha$ -tubulin (#sc-12462), and CK2 $\alpha$  (#sc-12738; Santa Cruz Biotechnology,  
7 CA, USA). Moreover, Flag M2 antibody (#3165) was purchased from Sigma-Aldrich  
8 (MO, USA), whereas horseradish peroxidase (HRP) - conjugated goat anti-mouse  
9 (115-035-006) and HRP-conjugated goat anti-rabbit (111-035-006) antibodies  
10 were purchased from Jackson ImmunoResearch Laboratories (PA, USA). We also  
11 purchased blebbistatin (#B592500; Toronto Research Chemicals, ON, Canada),  
12 TGF- $\beta$ 1 (#240B; R&D systems, MN, USA), TBB (#218697; Calbiochem, CA, USA),  
13 SB202190 (#S7067; Sigma-Aldrich), SP600125 (#S5567; Sigma-Aldrich), and  
14 PD98059 (#1213, MEK inhibitor; Tocris, Bristol, UK).

15

### 16 Plasmid constructs

17 Various truncated mutants of  $\alpha$ -TAT1 (*Mus musculus*, isoform 1) tagged with GFP  
18 or Myc were generated by polymerase chain reaction (PCR) using specific forward  
19 and reverse primers complementary to the defined sequences, using GFP- $\alpha$ -TAT1  
20 as a template.  $\alpha$ -TAT1 <sup>$\Delta$ C</sup>,  $\alpha$ -TAT1 <sup>$\Delta$ N</sup>,  $\alpha$ -TAT1 <sup>$\Delta$ C1</sup>,  $\alpha$ -TAT1 <sup>$\Delta$ C1-2</sup>, and  $\alpha$ -TAT1 <sup>$\Delta$ C3</sup> were  
21 cloned between XhoI and BamHI restriction sites and inserted into the pEGFP-C1  
22 vector (Clontech, CA, USA).  $\alpha$ -TAT1 <sup>$\Delta$ N</sup> was cloned between BamHI and XbaI  
23 restriction sites and inserted into the pcDNA6/Myc-His A vector (Invitrogen).  
24 *Csnk2a1* (CK2 $\alpha$ ) cDNA was amplified from XE242 mouse CK2 $\alpha$  CS2p+ (#16730;  
25 Addgene, MA, USA) via PCR and cloned into the p3xFLAG-CMV<sup>TM</sup>-10 expression  
26 vector (#E4401; Sigma-Aldrich). The primer sequences used for plasmid  
27 construction are listed in Supplementary Table 1. Point mutations were introduced  
28 via PCR using the *PfuUltra* High-Fidelity DNA polymerase (#600380; Agilent, CA,  
29 USA). The sequences of the primers used for site-directed mutagenesis are listed  
30 in Supplementary Table 2.

31

### 32 Cell culture

1 WT and  $\alpha$ -TAT1 KO MEFs were cultured in Dulbecco's modified Eagle's medium  
2 (DMEM; Gibco-BRL, Grand Island, NY, USA) supplemented with 1% GlutaMAX, 1%  
3 minimum essential medium (MEM) containing non-essential amino acids, 10%  
4 fetal bovine serum (FBS) (Youngin Frontier, Seoul, Korea), 100 unit/mL penicillin,  
5 and 100  $\mu$ g/mL streptomycin (Welgene, Seoul, Korea). The cells were maintained  
6 at 37 °C and 5% carbon dioxide in a humidified incubator. HEK293T cells were  
7 obtained from American Type Culture Collection (Manassas, VA, USA). HEK293T  
8 cells were cultured in DMEM supplemented with 10% FBS.

### 9 10 Generation of *CK2 $\alpha$* KO cell line using CRISPR/Cas9

11 A 20-bp guide RNA (gRNA) sequence (5'-AGACATTGTAAAAGACCCTG-3')  
12 targeting genomic DNA within exon 3 of *CK2 $\alpha$*  was selected from the GenBank  
13 database (Accession number NC\_000068; region: 152067851 - 152123772) of  
14 predicted high-specificity protospacer adjacent motif sequences in the mouse  
15 exome. gRNA was cloned into LentiCRISPR V2 (#52961; Addgene) and WT MEFs  
16 were infected with lentivirus containing the gRNA sequence with polybrene (0.8  
17  $\mu$ g/mL) for 48 h. Cells were selected using puromycin (2  $\mu$ g/mL) and single-cell  
18 colonies were acquired. *CK2 $\alpha$*  KO cell line was verified by genomic DNA sequencing  
19 and western blotting.

### 20 21 Transfection

22 The cells ( $3 \times 10^5$ ) were plated on 60-mm dishes and then transfected with 2.5  $\mu$ g  
23 of DNA after 24 h using Lipofectamine 2000 (#11668019; Thermo Fisher Scientific,  
24 NH, USA), according to the manufacturer's instructions. Later, the cells ( $7 \times 10^5$ )  
25 were plated in a 6-well plate and then transfected with 500 ng of DNA after 24 h  
26 using TransFectin™ Lipid Reagent (#1703351; Bio-Rad, CA, USA).

### 27 28 Co-IP and western blotting

29 For western blotting, the cells were lysed with the lysis buffer containing 1% Nonidet  
30 P-40 (NP-40), 1% sodium dodecyl sulfate, 150 mM NaCl, 6 mM Na<sub>2</sub>HPO<sub>4</sub>, 4 mM  
31 NaH<sub>2</sub>PO<sub>4</sub>, 2 mM ethylenediaminetetraacetic acid (EDTA), 50 mM NaF, 1 mM Na<sub>3</sub>VO<sub>4</sub>,  
32 1 mM 1,4-dithiothreitol, and 1 mM phenylmethylsulfonyl fluoride (PMSF). Protein  
33 concentrations were measured using the bicinchoninic acid assay (Thermo Fisher

1 Scientific). For IP, the cells were lysed with IP buffer (50 mM Tris-Cl (pH 7.4), 150  
2 mM NaCl, 1% NP-40, 0.5% Triton X-100, 1 mM Na<sub>3</sub>VO<sub>4</sub>, 50 mM NaF, 1 mM PMSF,  
3 10% glycerol, and 2 mM EDTA) for 1 h on ice and centrifuged at 4 °C and 13,000 rpm  
4 for 15 min to collect the supernatant. Protein concentrations were measured using  
5 Bradford assay (Bio-Rad, Hercules, CA, USA). The proteins (1 mg) were incubated  
6 with primary antibodies at 4 °C overnight. Following incubation, protein A/G beads  
7 were incubated at 4 °C for 2 h. Finally, the beads were washed thrice with the IP  
8 buffer, boiled, and analyzed by western blotting. Signals were developed using  
9 enhanced chemiluminescence reagents (Bio-Rad) and band density was measured  
10 using the Quantity One system (Bio-Rad).

11

### 12 Statistical analyses

13 Statistical analyses were performed using GraphPad Prism 7 software (GraphPad  
14 Software, CA, USA). We used the Student's *t*-test to compare two groups and one-  
15 way analysis of variance (ANOVA) to compare more than two groups. Tukey's  
16 multiple comparison test was applied to all ANOVA post hoc tests. ANOVA *F* values  
17 are described in each figure legend as  $F_{(DFn, Dfd)}$ , where DFn is the df numerator, and  
18 Dfd is the df denominator. Statistical significance was set at  $p < 0.05$  (\* $p < 0.05$ , \*\* $p <$   
19  $0.01$ , \*\*\* $p < 0.005$ ). All data are presented as the mean  $\pm$  standard deviation.

20

1  
2

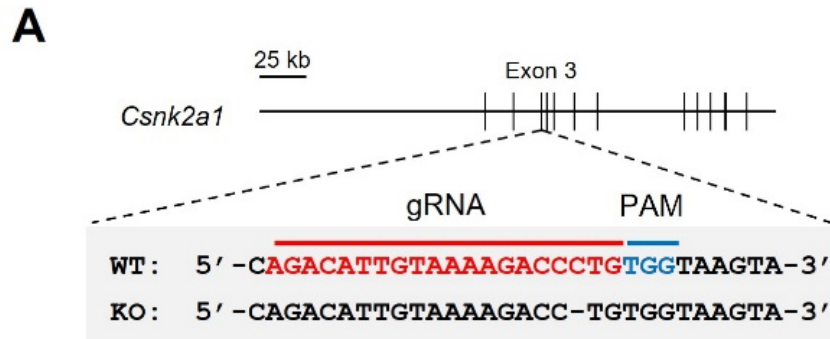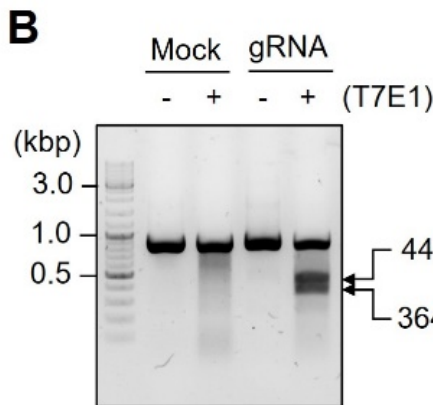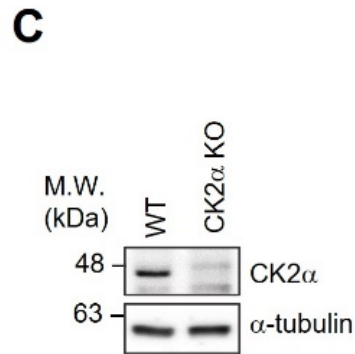

3  
4  
5  
6  
7  
8  
9  
10  
11  
12  
13

**Supplementary Fig. 1. CK2 $\alpha$  knockout (KO) cells were generated using the clustered regularly interspaced palindromic repeat-caspase 9 (CRISPR-Cas9) system. (A) Single guide RNA (gRNA) targeting exon 3 of *Csnk2a1* was selected by the GeneScript software. CK2 $\alpha$  KO MEFs were verified via DNA sequencing (single nucleotide deletion) (B) T7 endonuclease 1 assay was performed to determine the efficiency of gRNA. (C) Protein extracts obtained from the wild-type (WT) and CK2 $\alpha$  KO MEFs were subjected to western blotting to assess the protein expression levels of CK2 $\alpha$ .**

1  
2

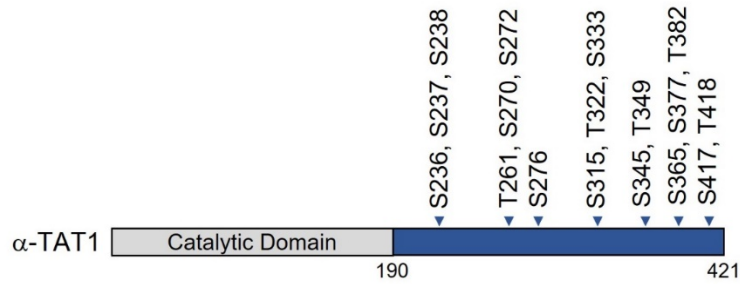

3  
4

5 **Supplementary Fig. 2. Putative phosphorylation sites in the C-terminal domain of**  
6 **α-tubulin acetyltransferase 1 (α-TAT1) of**  
7 ***Mus musculus*.** Putative serine/threonine phosphorylation sites in the C-terminal  
8 domain are indicated. These sites were obtained from PhosphoSitePlus and  
9 Netphos 3.1.

10

1  
2

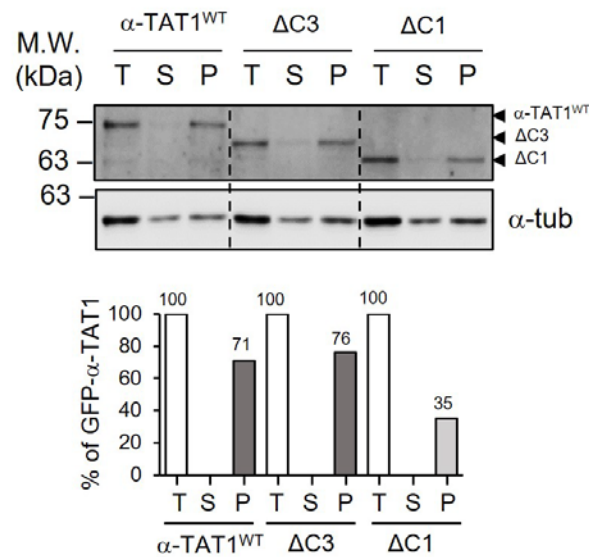

3  
4  
5  
6  
7  
8  
9  
10  
11

**Supplementary Fig. 3. Deletion of the Cluster 3 domain of  $\alpha$ -TAT1 maintained the binding affinity to polymerized microtubules.**  $\alpha$ -TAT1 KO MEFs were transfected with the indicated plasmids, and a microtubule sedimentation assay was conducted. Each fraction was assessed via western blotting to detect the levels of  $\alpha$ -TAT1 constructs (WT,  $\Delta$ C3, and  $\Delta$ C1), supernatant (S) (depolymerized tubulin), and pellet (P) (polymerized tubulin).

1  
2  
3  
4  
5  
6  
7  
8

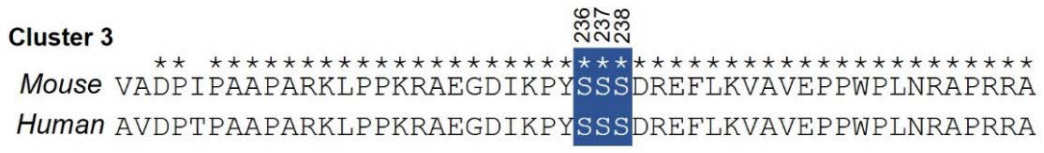

Supplementary Fig. 4. Amino acid sequence alignment of Cluster 3 in  $\alpha$ -TAT1 between mice (*M. musculus*) and humans (*Homo sapiens*). Cluster 3 domain in  $\alpha$ -TAT1 was highly conserved in both mice and humans.



1 **Supplementary Table 1. Primers used for plasmid construction**

| Plasmid                                                | Direction<br>(Restriction<br>enzyme) | Sequence                                |
|--------------------------------------------------------|--------------------------------------|-----------------------------------------|
| GFP- $\alpha$ -TAT1 <sup><math>\Delta</math>C1</sup>   | F (XhoI)                             | CCGCTCGAGGAATGGAGTTCCCGTTTCGAT          |
|                                                        | R (BamHI)                            | CGGGATCCGCCTCCAGGGTCAGTGCC              |
| GFP- $\alpha$ -TAT1 <sup><math>\Delta</math>C1,2</sup> | F (XhoI)                             | CCGCTCGAGGAATGGAGTTCCCGTTTCGAT          |
|                                                        | R (BamHI)                            | CGGGATCCGGCACGCCGAGGGGCCCTGTT           |
| GFP- $\alpha$ -TAT1 <sup><math>\Delta</math>C</sup>    | F (XhoI)                             | CCGCTCGAGGAATGGAGTTCCCGTTTCGAT          |
|                                                        | R (BamHI)                            | CGGGATCCCACAGCAGCACGAGAGTG              |
| GFP- $\alpha$ -TAT1 <sup><math>\Delta</math>N</sup>    | F (XhoI)                             | CCGCTCGAGGAATGGCCGATCCCATACCTGCTGCT     |
|                                                        | R (BamHI)                            | CGGGATCCTTACCAAGGCCTGGTGCTGCG           |
| $\alpha$ -TAT1 <sup><math>\Delta</math>N</sup> -Myc    | F (BamHI)                            | CGGGATCCATGGCCGATCCCATACCTGCTGCT        |
|                                                        | R (XbaI)                             | GCTCTAGACCAAGGCCTGGTGCTGCG              |
| GFP- $\alpha$ -TAT1 <sup><math>\Delta</math>C3</sup>   | 1-F (XhoI)                           | CCGCTCGAGGAATGGAGTTCCCGTTTCGAT          |
|                                                        | 2-R                                  | GTGGGCTGGAGGTGTCACAGCAGCACGAGA          |
|                                                        | 3-F                                  | TCTCGTGCTGCTGTGACACCTCCAGCCAC           |
|                                                        | 4-R (BamHI)                          | CGGGATCCTTACCAAGGCCTGGTGCTGCG           |
| Flag-CK2 $\alpha$                                      | F (NotI)                             | AAGGAAAAAAGCGGCCGCGATGTCGGGACCCGTGCCAAG |
|                                                        | R (KpnI)                             | CGGGGTACCTTACTGCTGAGCGCCAGC             |

2

3

1 **Supplementary Table 2. Primers used for site-directed mutagenesis of  $\alpha$ -TAT1**

| Plasmid             | Direction | Sequence                                   |
|---------------------|-----------|--------------------------------------------|
| GFP- $\alpha$ -TAT1 | F         | GGAGACATTAAGCCATACGCTTCCAGTGACAGAGAATTC    |
| (S236A)             | R         | GAATTCTCTGTCACTGGAAGCGTATGGCTTAATGTCTCC    |
| GFP- $\alpha$ -TAT1 | F         | GACATTAAGCCATACTCTGCCAGTGACAGAGAATTCCTGAAG |
| (S237A)             | R         | CTTCAGGAATTCTCTGTCAGTGGCAGAGTATGGCTTAATGTC |
| GFP- $\alpha$ -TAT1 | F         | GACATTAAGCCATACTCTCCGCTGACAGAGAATTCCTGAAG  |
| (S238A)             | R         | CTTCAGGAATTCTCTGTCAGCGGAAGAGTATGGCTTAATGTC |
| GFP- $\alpha$ -TAT1 | F         | GACATTAAGCCATACTCTGCCGCTGACAGAGAATTCCTGAAG |
| (S237/238A)         | R         | CTTCAGGAATTCTCTGTCAGCGGCAGAGTATGGCTTAATGTC |

2

3

4
